# Supplementary material
Source: PubMed Central journal article supplement (PMC3915338)
Supplement: NIHMS55511-supplement-1.pdf [file NIHMS55511-supplement-1.pdf]

---

*Adaptive versus innate receptor signals selectively control the pool sizes of murine IFN- $\gamma$  or IL-17-producing  $\gamma\delta$  T cells upon infection*

---

**Supplemental Figures:**

1. TCR stimulation favors  $\gamma\delta^{27+}$  cells *in vitro* and *in vivo*.
2. TCR V $\gamma$  repertoire of  $\gamma\delta$  T cell subsets following TCR/ CD3 activation.
3. CD27 confers homeostatic expansion advantage to  $\gamma\delta$  T cells.
4. Stability of CD27 expression in  $\gamma\delta$  T cell subsets after malaria infection.
5. *In vivo* LPS treatment induces strong proliferation of  $\gamma\delta^{27-}$  cells.
6. TLR2-dependent expansion of  $\gamma\delta^{27-}$  cells upon lipoprotein administration.
7. TLR agonists do not activate  $\gamma\delta^{27-}$  lymphocytes *in cis*.
8. Inflammatory cytokines produced by myeloid cells activate IL-17-producing  $\gamma\delta^{27-}$  lymphocytes *in cis*.

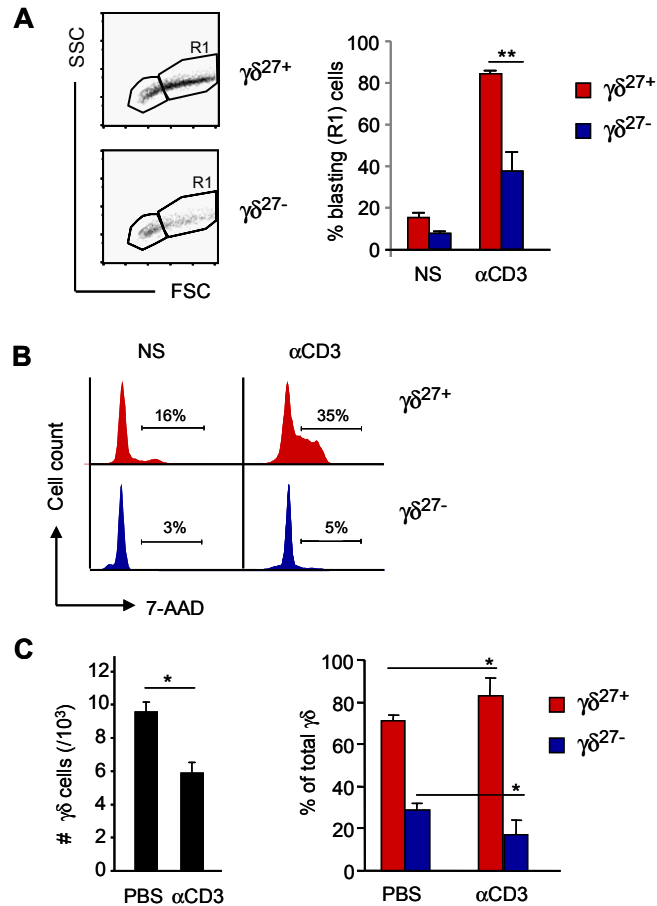

**Supplemental Figure 1. TCR stimulation favors  $\gamma\delta^{27+}$  cells *in vitro* and *in vivo*.**

(A-B) Peripheral  $\gamma\delta^{27+}$  and  $\gamma\delta^{27-}$  cells were FACS-sorted from pooled spleen and lymph nodes of C57Bl/6 mice and cultured for 72 hours with anti-CD3 $\epsilon$  mAb ( $\alpha$ CD3) in the presence of APC. Forward Scatter (FSC)/ Side Scatter (SSC) (left panel) and percentages of cells within R1 gate (“blasting cells”) (right panel) at 72 hours. Error bars represent SD (n=3, \*\*p<0.01). (B) Analysis of cell cycle status at 24 hours using the DNA intercalating dye 7-AAD. Data in (A-B) are representative of two independent experiments (each involving 4-6 animals) with consistent results. (C) C57Bl/6 mice were immunized intraperitoneally with 100  $\mu$ g  $\alpha$ CD3 mAb (or PBS as control). Cells were harvested from the peritoneal cavity after 3 days, and stained for surface TCR $\gamma\delta$ , CD3 and CD27. Absolute number of  $\gamma\delta$  T cells (left panel) and percentages of  $\gamma\delta^{27+}$  and  $\gamma\delta^{27-}$  cells (right panel). Error bars represent SD (n=5, \*p<0.05). Data are representative of two independent experiments (each involving 3 mice per group) with similar results.

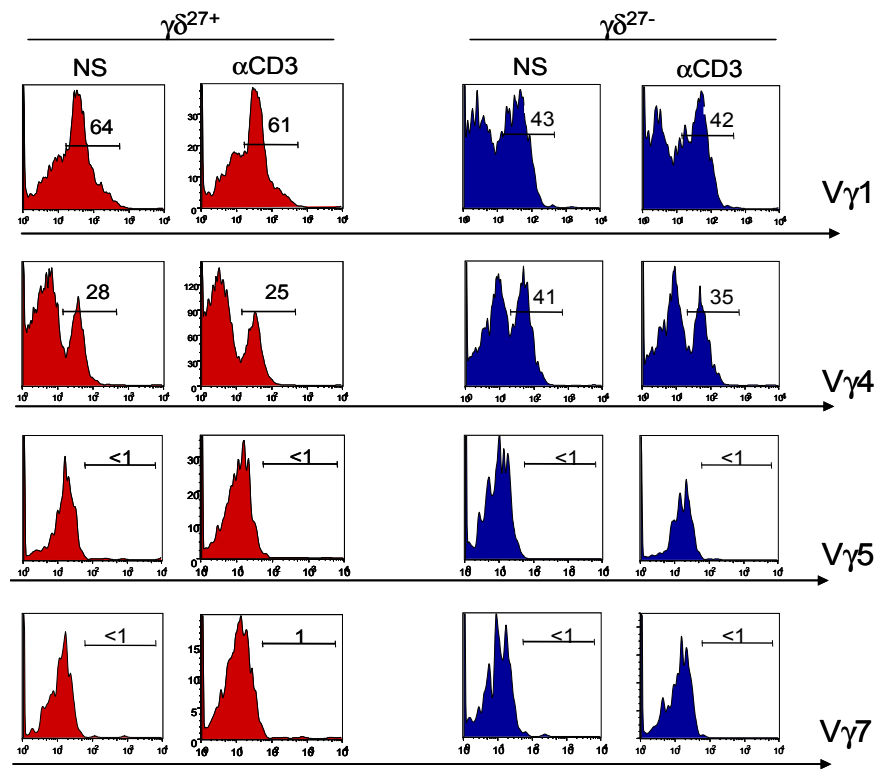

**Supplemental Figure 2. TCR V $\gamma$  repertoire of  $\gamma\delta$  T cell subsets following TCR/ CD3 activation.** Peripheral  $\gamma\delta^{27+}$  and  $\gamma\delta^{27-}$  cells were FACS-sorted from pooled spleen and lymph nodes of C57Bl/6 mice, cultured without (NS, non-stimulated) or with anti-CD3 $\epsilon$  mAb ( $\alpha$ CD3) for 48 hours, and then stained with mAbs specific for V $\gamma$ 1, V $\gamma$ 4, V $\gamma$ 5 or V $\gamma$ 7 TCR chains.

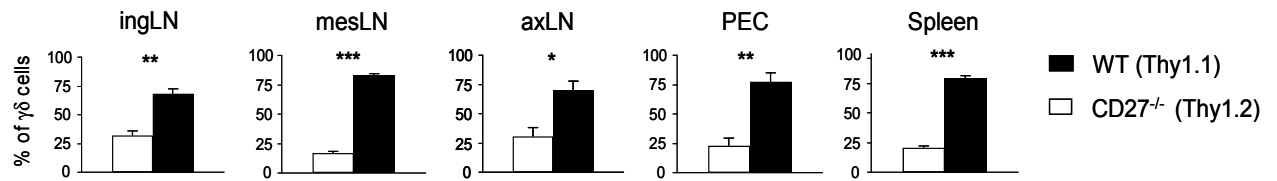

**Supplemental Figure 3. CD27 confers homeostatic expansion advantage to  $\gamma\delta$  T cells.**

Total  $\gamma\delta$  cells were FACS-sorted from pooled spleen and LN of *Cd27*<sup>+/+</sup>.Thy1.1 (WT) and *Cd27*<sup>-/-</sup>.Thy1.2 mice. Cells were co-injected at 50:50 ratio into *TCR $\delta$* <sup>-/-</sup> mice, and after 4 days organs were harvested and stained for CD3 $\epsilon$ , TCR $\delta$  and Thy1.2 to discriminate WT and *Cd27*<sup>-/-</sup>  $\gamma\delta$  cells. PEC, peritoneal cavity; LN, lymph nodes; ing, inguinal; mes, mesenteric; ax, axillary. Error bars represent SD (n=4), and significant differences between the percentages of the two populations are noted (\*p<0.05, \*\*p<0.01, \*\*\*p<0.001).

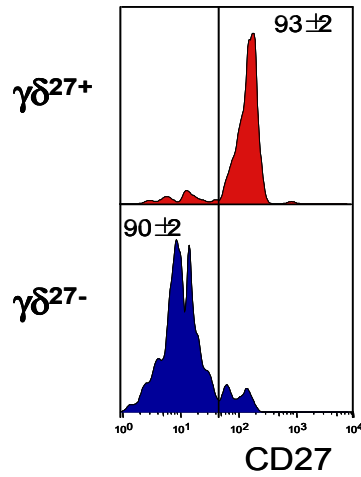

**Supplemental Figure 4. Stability of CD27 expression in  $\gamma\delta$  T cell subsets after malaria infection.**  $\gamma\delta^{27+}$  or  $\gamma\delta^{27-}$  cells were FACS-sorted from pooled spleen and lymph nodes of C57Bl/6 mice, and injected i.v. into separate Rag2-deficient mice (n=3 per group). Mice were infected with *Plasmodium berghei* on the following day, and sacrificed after 3 weeks. Splenocytes were harvested, stained for TCR $\delta$ , CD3 $\epsilon$  and CD27, and analyzed by flow cytometry. Indicated are the percentages  $\pm$  SD of cells within the original quadrants used to sort  $\gamma\delta^{27+}$  or  $\gamma\delta^{27-}$  cells.

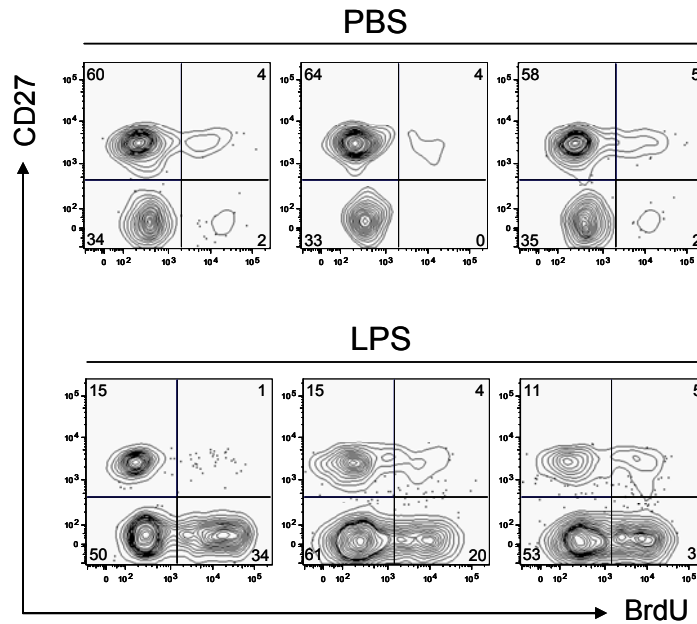

**Supplemental Figure 5. *In vivo* LPS treatment induces strong proliferation of  $\gamma\delta^{27-}$  cells.**

C57Bl/6 mice were injected intra-peritoneally with 50 $\mu$ g LPS, or PBS as control. The thymidine analogue bromodeoxyuridine (BrdU) was administered (1mg/mouse) daily until mice were sacrificed at day 3. Cells were harvested from the peritoneal cavity and stained for TCR $\delta$ , CD3 $\epsilon$  and CD27 expression. Cells were subsequently fixed, permeabilized and stained with FITC-labelled anti-BrdU mAb using the BrdU Flow Kit (BD Pharmingen).

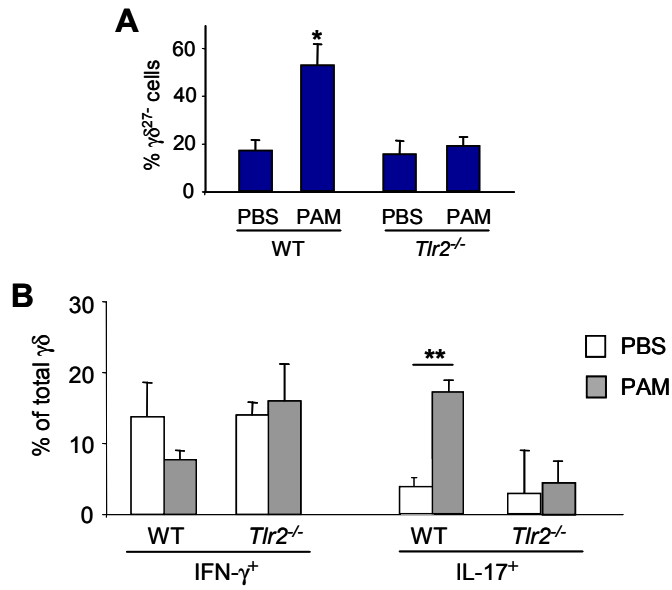

**Supplemental Figure 6. TLR2-dependent expansion of  $\gamma\delta^{27-}$  cells upon lipoprotein administration *in vivo*.** WT and *Tlr2*<sup>-/-</sup> mice were immunized intra-peritoneally with 50  $\mu$ g Pam<sub>3</sub>CysSerLys<sub>4</sub> (PAM) or PBS as control, and sacrificed after 3 days. (A) Percentages of  $\gamma\delta^{27-}$  cells within total  $\gamma\delta$  cells isolated from the peritoneal cavity (PEC). Error bars represent SD (n=3; \**p*<0.05). (B) Percentage of IFN- $\gamma^+$  or IL-17<sup>+</sup> cells upon intracellular cytokine staining of total  $\gamma\delta$  cells. Error bars represent SD (n=3; \*\**p*<0.01).

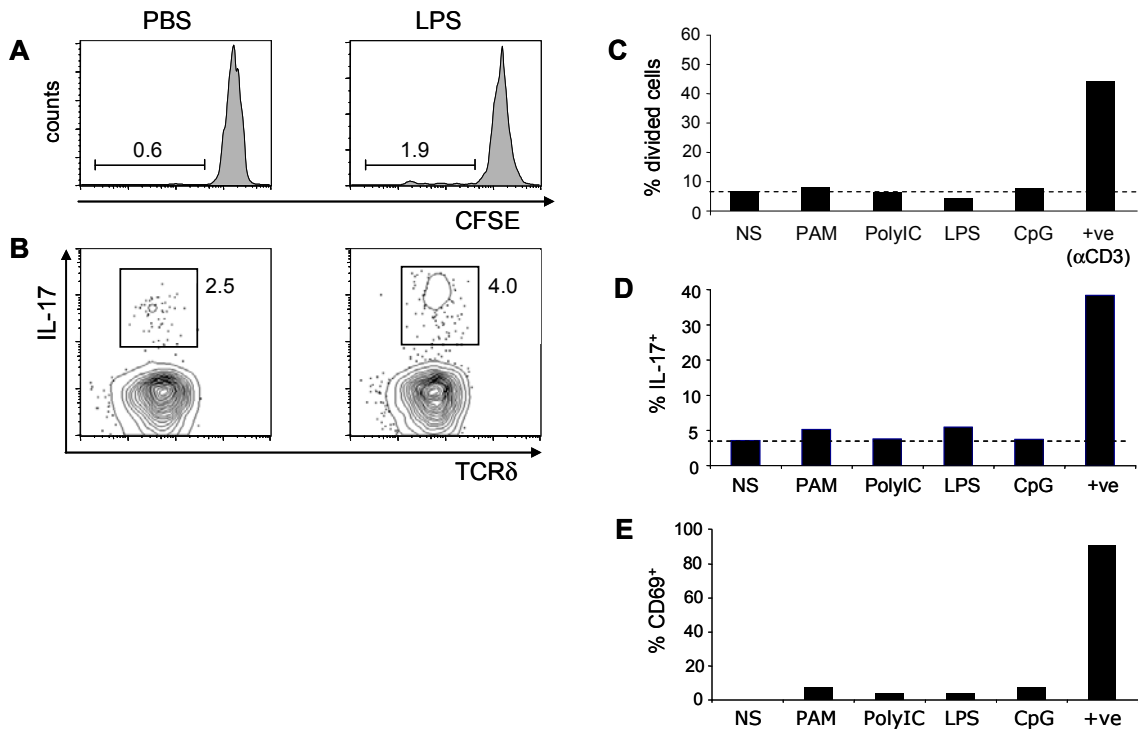

**Supplemental Figure 7. TLR agonists do not activate  $\gamma\delta^{27-}$  lymphocytes in cis.**

(A-B) FACS-sorted and CFSE-labeled TCR $\gamma\delta^+$  CD3<sup>+</sup> CD19<sup>-</sup> CD27<sup>-</sup> cells were cultured for 2 days without (non-stimulated, NS) or with 10  $\mu\text{g}/\text{mL}$  of LPS from *Salmonella* Minnesota R595. Cells were then analyzed for CFSE dilution (A) and intracellular IL-17 production (B). Data are representative of triplicate experiments with similar results. (C-D) FACS-sorted and CFSE-labeled TCR $\gamma\delta^+$  CD3<sup>+</sup> CD19<sup>-</sup> CD27<sup>-</sup> cells were cultured for 2 days with Pam<sub>3</sub>CysSerLys<sub>4</sub> (PAM; 3 $\mu\text{g}/\text{mL}$ ), polyI:C (10 $\mu\text{g}/\text{mL}$ ), LPS (10 $\mu\text{g}/\text{mL}$ ), CpG (1.5 $\mu\text{g}/\text{mL}$ ), or with anti-CD3 $\epsilon$  mAb (1 $\mu\text{g}/\text{mL}$ , plate-bound) as positive control (+ve). Cells were then analyzed for CFSE dilution (C), intracellular IL-17 production (D) and surface expression of the activation marker CD69 (E).



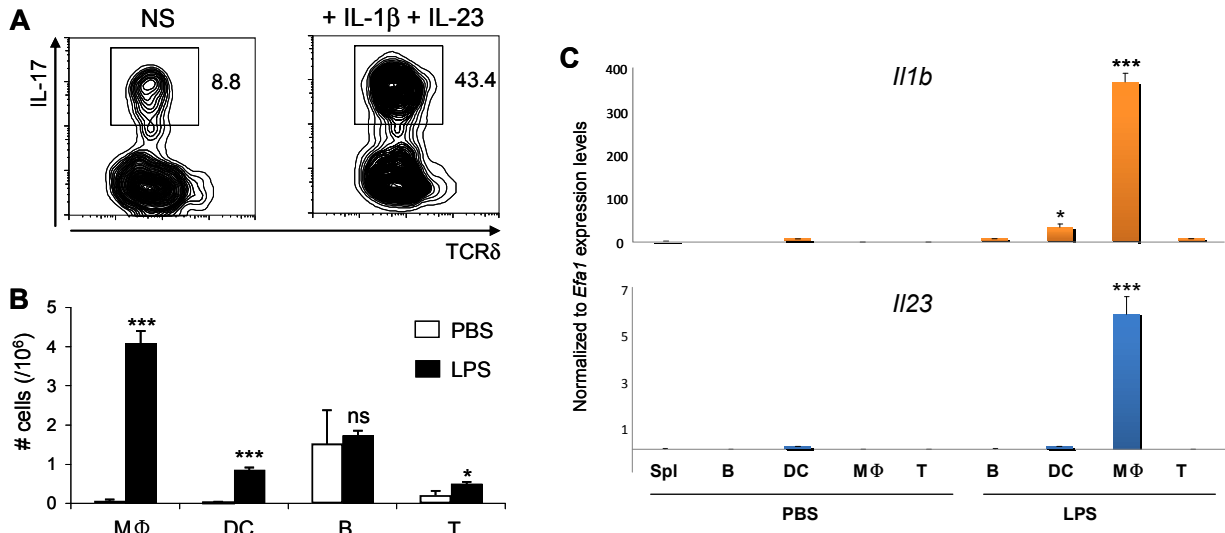

**Supplemental Figure 8. Inflammatory cytokines produced by myeloid cells activate IL-17-producing  $\gamma\delta^{27-}$  lymphocytes in cis.** (A) FACS-sorted TCR $\gamma\delta^+$  CD3 $^+$  CD19 $^-$  CD27 $^-$  cells were cultured for 2 days without (non-stimulated, NS) or with 10ng/mL of each IL-1 $\beta$  and IL-23, and then stained intracellularly for IL-17. Data are representative of duplicate experiments (each involving 4-6 animals) with similar results. (B-C) WT mice were injected intra-peritoneally with 50 $\mu$ g LPS or with PBS as control, and sacrificed after 3 days. CD19 $^+$  (B), CD11c $^{\text{high}}$  CD11b $^{\text{low}}$  (DC), CD11c $^{\text{low}}$  CD11b $^{\text{high}}$  (M $\Phi$ ) or CD3 $^+$  (T) cells were FACS-analyzed and sorted from the peritoneal cavity (PEC). (B) Absolute numbers of cells from each PEC population. (C) Quantitative real-time PCR data for *IL1b* and *IL23*, in arbitrary units normalized to the housekeeping gene *Efa1*, in each cell population. Error bars represent SD (n=3) and significant differences between PBS and LPS treatments are noted (\* $p$ <0.05; \*\*\* $p$ <0.001).
